# Supplementary material
Source: PubMed Central journal article supplement (PMC4933585)
Supplement: NIHMS3951-supplement-1.pdf [file NIHMS3951-supplement-1.pdf]

**A CD74-DEPENDENT MHC CLASS I ENDOLYSOSOMAL CROSS-PRESENTATION  
PATHWAY**

Genc Basha<sup>#</sup>, Kyla Omilusik<sup>#</sup>, Ana Chavez-Steenbock, Anna T. Reinicke, Nathan Lack, Kyung  
Bok Choi, and Wilfred A. Jefferies\*

The Biomedical Research Centre, The Michael Smith Laboratories,  
The Centre for Blood Research, The Brain Research Centre, Departments of Microbiology and  
Immunology, Medical Genetics and Zoology  
University of British Columbia,  
2222 Health Sciences Mall, Vancouver, BC, Canada V6T 1Z3

\*Corresponding author: Professor Wilfred A. Jefferies [wilf@interchange.ubc.ca](mailto:wilf@interchange.ubc.ca)

<sup>#</sup>These authors contributed equally to this work

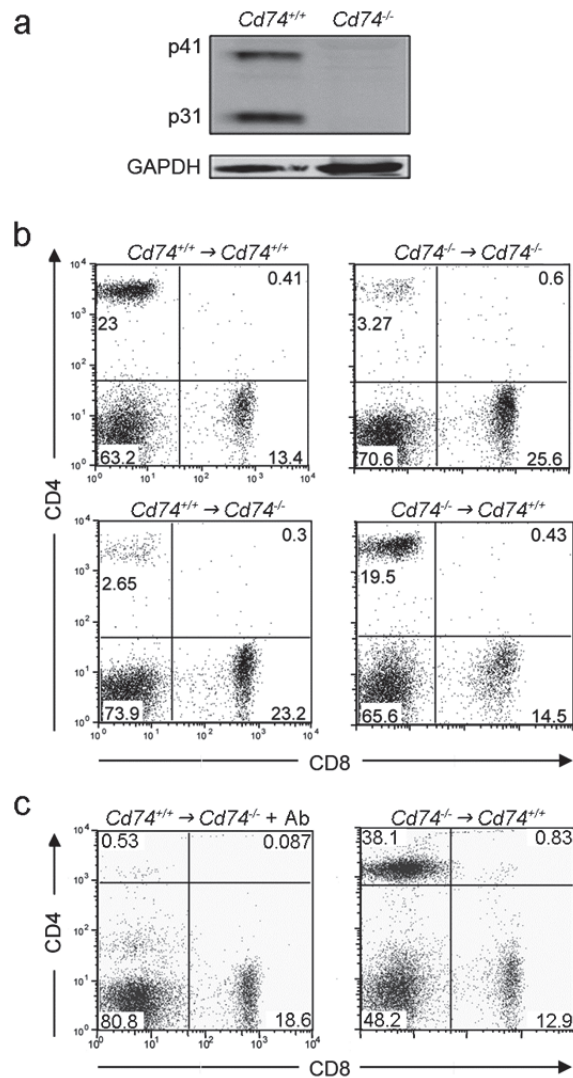

**Supplementary Figure 1. Peripheral analysis of chimeric mice.** (a) Immunoblotting of *Cd74*<sup>+/+</sup> and *Cd74*<sup>-/-</sup> BMDCs was performed using a CD74 antibody. GAPDH was detected as a loading control. (b) The CD8<sup>+</sup>-CD4<sup>+</sup> profile in the blood of bone marrow chimera mice three months following reconstitution is presented. (c) *Cd74*<sup>+/+</sup>→*Cd74*<sup>-/-</sup> chimeras were depleted of CD4<sup>+</sup> cells by iv injection of a CD4 antibody (GK1.5). Representative CD4<sup>+</sup>-CD8<sup>+</sup> flow cytometry profiles are shown.

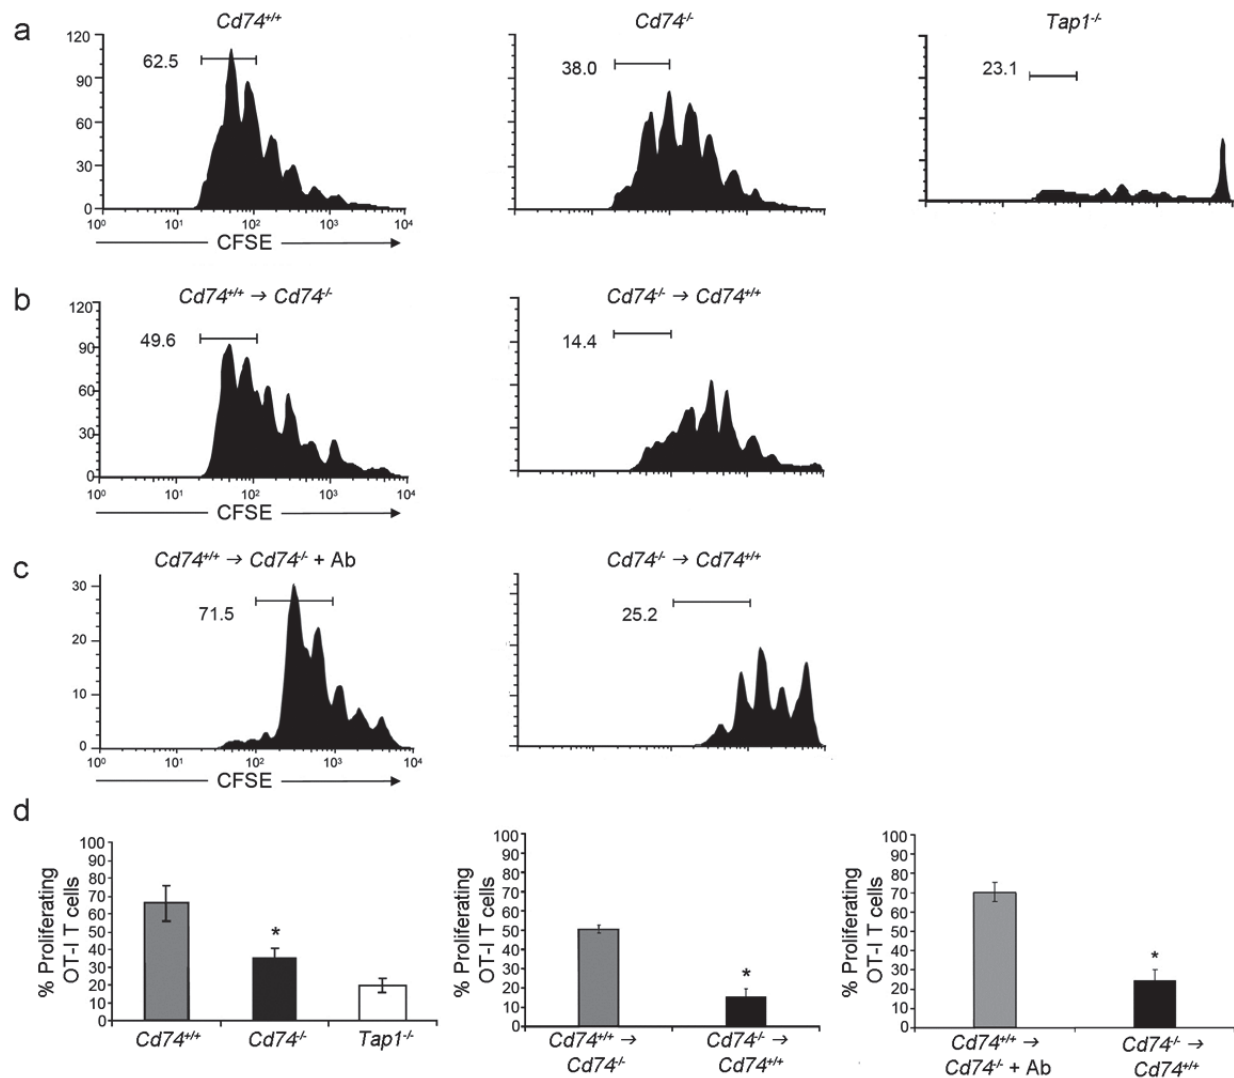

**Supplementary Figure 2. *Cd74<sup>-/-</sup>* mice are unable to cross-present cell-associated antigens *in vivo* to generate an effective primary immune response.** (a,b) OVA-pulsed C3H-derived BMDCs (H-2K<sup>k</sup> haplotype) were injected (ip) then OT-I transgenic CFSE-labeled T cells were injected (iv) into mice and chimeras. CFSE dilution of CD8<sup>+</sup> populations from the spleen was examined. Data represent proliferating OT-I-derived T cells from spleen of representative mice or chimeras as indicated (n=3). (c) *Cd74<sup>+/+</sup> → Cd74<sup>-/-</sup>* chimeras were depleted of CD4<sup>+</sup> cells by iv injection of a CD4 antibody (GK1.5; + Ab) during immunization with cell-associated OVA then assessed for their ability to activate CFSE-labeled adoptively transferred OT-I-derived T cells. (d) The mean percentage (± SD) of OT-I cells proliferating is shown. \* p < 0.05.

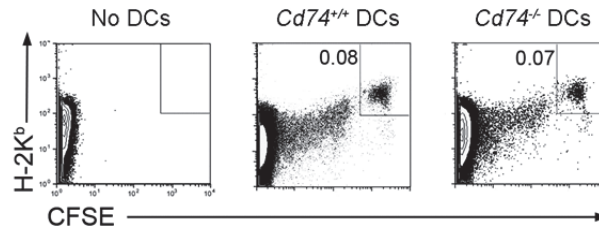

**Supplementary Figure 3. *Cd74*<sup>-/-</sup> DCs localize to the spleen.** *Cd74*<sup>+/+</sup> or *Cd74*<sup>-/-</sup> splenic DCs were CFSE labeled and iv injected into *Rag1*<sup>-/-</sup> mice on a BALB/c background. Two hours later, DC localization to the spleen was assessed.
